# Supplementary material
Source: Elsevier journal article supplement (https://www.sciencedirect.com/science/article/pii/S2530064422000360)
Supplement: mmc2 [file S2530064422000360:mmc2.docx]

**Table S1.** Age and location of sampling plots representing successional stages of the tropical deciduous forest in the Chamela region.

| **Plot** | **Succession stage** | **Years since abandonment** | **Latitude N** | **Longitude W** | **Altitude**  **m. asl** |
| --- | --- | --- | --- | --- | --- |
| Ranchitos (R 0-0) | Pasture | 0 | 19º36’51.12’’ | 105º01’17.62’’ | 193 |
| Santa Cruz (SC 0-0) | Pasture | 0 | 19º35’15.14’’ | 105º02’05.05’’ | 147 |
| Zapata (Z 0-0) | Pasture | 0 | 19º22’60.00’’ | 104º56’54.40’’ | 56 |
| Santa Cruz (SC 5-6) | Early Forest | 5 | 19º35’13.62’’ | 105º02’04.03’’ | 157 |
| Zapata (Z 5-6) | Early Forest | 5 | 19º23.2’2.8’’ | 104º56’54.42’’ | 78 |
| San Mateo (SM 5-6) | Early Forest | 6 | 19º34’50.64’’ | 105º03’36.37’’ | 185 |
| Ranchitos (R 8-10) | Young Forest | 8 | 19º36’53.92’’ | 105º01’17.45’’ | 196 |
| Caimán (C 8-10) | Young Forest | 9 | 19º28’43.61’’ | 104º55’59.69’’ | 116 |
| Santa Cruz (SC 8-10) | Young Forest | 10 | 19º36’07.33’’ | 105º02’34.54’’ | 138 |
| Ranchitos (R 15-17) | Intermediate forest | 15 | 19º35’31.77’’ | 105º00’32.24’’ | 156 |
| Santa Cruz (SC 15-17) | Intermediate forest | 15 | 19º35’58.80’’ | 105º02’54.50’’ | 106 |
| Caimán (C 15-17) | Intermediate forest | 17 | 19º28’01.30’’ | 104º56’12.42’’ | 46 |
| Gargoyo (G) | Primary forest | without alteration | 19º24’16.40’’ | 104º58’59.00’’ | 29 |
| Tejón 1 (T1) | Primary forest | without alteration | 19º30’05.90’’ | 105º02’36.90’’ | 68 |
| Tejón 2 (T2) | Primary forest | without alteration | 19º30’34.10’’ | 105º02’23.30’’ | 73 |
