# Supplementary material
Source: Elsevier journal article supplement (https://www.sciencedirect.com/science/article/pii/S2530064422000360)
Supplement: mmc3 [file S2530064422000360:mmc3.docx]

**Table S2.** List of amphibian and reptile species registered in this study.

| Class | Order | Family | Species | No. individuals:  total (rainy/dry season) |
| --- | --- | --- | --- | --- |
| Amphibia | Anura | Hylidae | *Dendropsophus sartori* | 11 (4/7) |
|  |  | Hylidae | *Trachycephalus typhonius* | 78 (55/23) |
|  |  | Hylidae | *Smilisca baudinii* | 108 (88/20) |
|  |  | Hylidae | *Smilisca fodiens* | 129 (128/1) |
|  |  | Hylidae | *Triprion spatulatus* | 358 (191/167) |
|  |  | Hylidae | *Tlalocohyla smithii* | 19 (10/9) |
|  |  | Hylidae | *Exerodonta smaragdina* | 8 (1/7) |
|  |  | Phyllomedusidae | *Agalychnis dacnicolor* | 68 (27/41) |
|  |  | Bufonidae | *Incilius mazatlanensis* | 3 (2/1) |
|  |  | Bufonidae | *Incilius marmoreus* | 279 (275/4) |
|  |  | Bufonidae | *Rhinella marina* | 12 (12/0) |
|  |  | Leptodactylidae | *Leptodactylus melanonotus* | 58 (35/23) |
|  |  | Eleutherodactylidae | *Eleutherodactylus nitidus* | 2 (1/1) |
|  |  | Craugastoridae | *Craugastor occidentalis* | 15 (15/0) |
|  |  | Microhylidae | *Hypopachus ustus* | 17 (16/1) |
|  |  | Microhylidae | *Hypopachus variolosus* | 33 (32/1) |
|  |  | Ranidae | *Rana forreri* | 2 (1/1) |
| Reptilia | Squamata | Eublepharidae | *Coleonyx elegans* | 23 (15/8) |
|  |  | Phyllodactylidae | *Phyllodactylus lanei* | 53 (38/15) |
|  |  | Scincidae | *Plestiodon parvulus* | 2 (2/0) |
|  |  | Scincidae | *Scincella assata* | 1 (1/0) |
|  |  | Scincidae | *Marisora unimarginata* | 1 (1/0) |
|  |  | Teiidae | *Holcosus undulatus* | 54 (39/15) |
|  |  | Teiidae | *Aspidoscelis communis* | 193 (163/30) |
|  |  | Teiidae | *Aspidoscelis deppei* | 59 (59/0) |
|  |  | Teiidae | *Aspidoscelis lineattissimus* | 349 (198/151) |
|  |  | Helodermatidae | *Heloderma horridum* | 1 (1/0) |
|  |  | Anguidae | *Gerrhonotus liocephalus* | 1 (1/0) |
|  |  | Iguanidae | *Iguana iguana* | 3 (2/1) |
|  |  | Iguanidae | *Ctenosaura pectinata* | 33 (28/5) |
|  |  | Phrynosomatidae | *Urosaurus bicarinatus* | 111 (69/42) |
|  |  | Phrynosomatidae | *Sceloporus utiformis* | 785 (479/306) |
|  |  | Phrynosomatidae | *Sceloporus melanorhinus* | 75 (48/27) |
|  |  | Phrynosomatidae | *Sceloporus horridus* | 26 (21/5) |
|  |  | Dactyloidae | *Anolis nebulosus* | 916 (468/448) |
|  |  | Leptotyphlopidae | *Rena humilis* | 1 (1/0) |
|  |  | Boidae | *Boa constrictor* | 5 (4/1) |
|  |  | Loxocemidae | *Loxocemus bicolor* | 6 (5/1) |
|  |  | Viperidae | *Agkistrodon bilineatus* | 1 (1/0) |
|  |  | Viperidae | *Crotalus basiliscus* | 7 (5/2) |
|  |  | Elapidae | *Micrurus distans* | 2 (2/0) |
|  |  | Colubridae | *Oxybelis aeneus* | 28 (18/10) |
|  |  | Colubridae | *Salvadora mexicana* | 8 (3/5) |
|  |  | Colubridae | *Tantilla calamarina* | 4 (3/1) |
|  |  | Colubridae | *Masticophis mentovarius* | 28 (18/10) |
|  |  | Colubridae | *Leptophis diplotropis* | 10 (7/3) |
|  |  | Colubridae | *Trimorphodon biscutatus* | 7 (5/2) |
|  |  | Colubridae | *Drymarchon corais* | 4 (4/0) |
|  |  | Colubridae | *Pseudoficimia frontalis* | 2 (1/1) |
|  |  | Colubridae | *Symphimus leucostomus* | 4 (4/0) |
|  |  | Colubridae | *Lampropeltis triangulum* | 4 (1/3) |
|  |  | Colubridae | *Enulius flavitorques* | 4 (4/0) |
|  |  | Colubridae | *Hypsiglena torquata* | 6 (5/1) |
|  |  | Colubridae | *Imantodes gemmistratus* | 8 (5/3) |
|  |  | Colubridae | *Leptodeira uribei* | 6 (4/2) |
|  |  | Colubridae | *Leptodeira maculata* | 19 (12/7) |
|  |  | Colubridae | *Tropidodipsas philippi* | 4 (4/0) |
|  |  | Colubridae | *Dipsas gaigeae* | 3 (3/0) |
|  |  | Colubridae | *Manolepis putnami* | 3 (2/1) |
