# Supplementary material
Source: Elsevier journal article supplement (https://www.sciencedirect.com/science/article/pii/S2530064422000360)
Supplement: mmc4 [file S2530064422000360:mmc4.docx]

**Table S3**. Observed and estimated number of species and sampling completeness for amphibian and reptile communities using nonparametric estimators.

| Successional stage | Number of observed species | ICE | Chao2 | Bootstrap | Completeness % |
| --- | --- | --- | --- | --- | --- |
| *Amphibians* |  |  |  |  |  |
| Pasture | 12 | 13.95 | 12.64 | 13.35 | 86-95 |
| Early forest | 9 | 11.78 | 9.86 | 10.23 | 76-91 |
| Young forest | 11 | 12.2 | 11.21 | 12.03 | 90-98 |
| Intermediate forest | 10 | 14.76 | 12.67 | 11.65 | 68-86 |
| Primary forest | 8 | 12.37 | 13.14 | 9.4 | 65-85 |
|  |  |  |  |  |  |
| *Reptiles* |  |  |  |  |  |
| Pasture | 26 | 33.4 | 31.17 | 29.4 | 82-88 |
| Early forest | 24 | 41.12 | 49.38 | 28.14 | 49-85 |
| Young forest | 29 | 44.2 | 53.1 | 34.1 | 55-85 |
| Intermediate forest | 30 | 43.6 | 33.7 | 34.7 | 69-89 |
| Primary forest | 28 | 37.36 | 30.58 | 31.9 | 75-92 |
